# Supplementary material
Source: publisher site journal article supplement (https://www.spandidos-publications.com/7454/downloadSupplementary)
Supplement: Supplementary file 1 [file downloadSupplementary]

## Sheet: Supplementary Table1
Table SI. m7G regulatory genes.
AGO2	IFIT5	NUDT3
CYFIP1	LARP1	NUDT4
CYFIP2	LSM1	NUDT4B
DCP2	METTL1	NUDT5
DCPS	NCBP1	NUDT7
EIF3D	NCBP2	RNMT
EIF4A1	NCBP2L	SNUPN
EIF4E	NCBP3	TRMT112
EIF4E1B	NUDT1	WDR4
EIF4E2	NUDT10
EIF4G3	NUDT11
GEMIN5	NUDT16
IF4E3	NUDT16L1
